# Supplementary material for: A secreted WY-domain-containing protein present in European isolates of the oomycete Plasmopara viticola induces cell death in grapevine and tobacco species
Source: PubMed Central journal article supplement (PMC6663016; doi:10.1371/journal.pone.0220184), 2019-07-29
Supplement: pone.0220184.s009.pdf [file pone.0220184.s009.pdf]

**Supplementary Table 1.** Summary of results of the search for proteins similar to *P. viticola* WY-domain-containing proteins in other oomycetes.

| Species                                    | Total hits <sup>a</sup> | RXLR <sup>b</sup> | No RXLR <sup>c</sup> | No RXLR – EER <sup>d</sup> |
|--------------------------------------------|-------------------------|-------------------|----------------------|----------------------------|
| <i>Phytophthora infestans</i>              | 87                      | 66                | 21                   | 19                         |
| <i>Phytophthora parasitica</i>             | 63                      | 51                | 12                   | 12                         |
| <i>Peronospora tabacina</i>                | 25                      | 10                | 15                   | 13                         |
| <i>Plasmopara halstedii</i> 710            | 35                      | 4                 | 31                   | 21                         |
| <i>Plasmopara halstedii</i> OS-Ph8-99-BIA4 | 20                      | 2                 | 18                   | 14                         |
| <i>Hyaloperonospora arabidopsidis</i>      | 6                       | 0                 | 6                    | 6                          |

**a:** Blast hits after filtering for presence of signal peptide and absence of transmembrane domain. **b:** Number of proteins from *a* carrying RXLR or RXLR-like motifs. **c:** Number of proteins from *a* lacking RXLR or RXLR-like motifs. **d:** Number of proteins from *c* showing dEER or dEER-like motifs inside the first 80 amino acids.

Details of Blast searches and filtering are described in the Supplementary Methods section.
