# Supplementary material for: A secreted WY-domain-containing protein present in European isolates of the oomycete Plasmopara viticola induces cell death in grapevine and tobacco species
Source: PubMed Central journal article supplement (PMC6663016; doi:10.1371/journal.pone.0220184), 2019-07-29
Supplement: pone.0220184.s010.pdf [file pone.0220184.s010.pdf]

**Supplementary Table 2.** Results of PCR amplification of Pv33 on genomic DNA from *P. viticola* isolates from different geographical origins and host sources. PCRs were performed using primers designed to amplify the whole gene sequence, from ATG to STOP. PCR with primers for the *P. viticola* tubulin gene confirmed the presence of pathogen DNA in all samples.

| Isolate | Host                 | Collection site                | Amplification |
|---------|----------------------|--------------------------------|---------------|
| PvSC    | <i>V. vinifera</i>   | Colmar, France                 | ✓             |
| Pv393   | <i>V. vinifera</i>   | Cugnasco, Switzerland          | ✓             |
| Pv340   | <i>V. vinifera</i>   | Tolcsva, Hungary               | ✓             |
| Pv257   | <i>V. vinifera</i>   | Listrac, France                | ✓             |
| Pv125   | Regent               | Pécs, Hungary                  | ✓             |
| Pv412   | Regent               | Cugnasco, Switzerland          | ✓             |
| Pv13    | Regent               | Latresne, France               | ✓             |
| MSU1106 | <i>V. vinifera</i>   | Clarksville, Michigan, USA     | ✗             |
| NY220   | <i>V. vinifera</i>   | Long Island, New York, USA     | ✗             |
| MSU1052 | <i>V. labrusca</i>   | Fenville, Michigan, USA        | ✗             |
| MSU319  | <i>V. labrusca</i>   | Stones, Ohio, USA              | ✗             |
| MSU330  | <i>V. aestivalis</i> | Markko, Ohio, USA              | ✗             |
| WV16    | <i>V. aestivalis</i> | Convington, West Virginia, USA | ✗             |
| MSU162  | <i>V. vinifera</i>   | Jackson, Michigan, USA         | ✗             |
| FLO23   | <i>V. aestivalis</i> | Thallahassee, Florida, USA     | ✗             |
| NY328   | <i>V. riparia</i>    | Ithaca, New York, USA          | ✗             |
| MSU1172 | <i>V. riparia</i>    | Fenville, Michigan, USA        | ✗             |
