# Supplementary material for: A secreted WY-domain-containing protein present in European isolates of the oomycete Plasmopara viticola induces cell death in grapevine and tobacco species
Source: PubMed Central journal article supplement (PMC6663016; doi:10.1371/journal.pone.0220184), 2019-07-29
Supplement: pone.0220184.s011.pdf [file pone.0220184.s011.pdf]

**Supplementary Table 3.** RNA-Seq statistics and RSA accession numbers.

| Provider         | Sample      | Biological replicate | Host                              | Tissue | # of pairs | size (nt) | # of unambiguous mapped pairs on Pv221 genome | SRA accession |
|------------------|-------------|----------------------|-----------------------------------|--------|------------|-----------|-----------------------------------------------|---------------|
| INRA / GET-Plage | Pv221 24hpi | 1                    | Vitis vinifera cv. Muscat Ottonel | leaves | 46 047 551 | 100       | 16 670                                        | SRR7500372    |
| INRA / GET-Plage | Pv221 24hpi | 2                    | Vitis vinifera cv. Muscat Ottonel | leaves | 31 978 558 | 100       | 29 439                                        | SRR7500373    |
| INRA / GET-Plage | Pv221 24hpi | 3                    | Vitis vinifera cv. Muscat Ottonel | leaves | 26 751 573 | 100       | 19 740                                        | SRR7500375    |
| INRA / GET-Plage | Pv221 48hpi | 1                    | Vitis vinifera cv. Muscat Ottonel | leaves | 48 442 856 | 100       | 1 294 356                                     | SRR7500376    |
| INRA / GET-Plage | Pv221 48hpi | 2                    | Vitis vinifera cv. Muscat Ottonel | leaves | 53 270 151 | 100       | 307 908                                       | SRR7500369    |
| INRA / GET-Plage | Pv221 48hpi | 3                    | Vitis vinifera cv. Muscat Ottonel | leaves | 30 664 708 | 100       | 227 777                                       | SRR7500370    |
| INRA / GET-Plage | Pv221 72hpi | 1                    | Vitis vinifera cv. Muscat Ottonel | leaves | 31 057 365 | 150       | 369 013                                       | SRR7500374    |
| INRA / GET-Plage | Pv221 72hpi | 2                    | Vitis vinifera cv. Muscat Ottonel | leaves | 37 993 907 | 150       | 1 314 505                                     | SRR7500371    |
| INRA / GET-Plage | Pv221 72hpi | 3                    | Vitis vinifera cv. Muscat Ottonel | leaves | 36 069 269 | 150       | 304 513                                       | SRR7500377    |
