# Supplementary material for: A secreted WY-domain-containing protein present in European isolates of the oomycete Plasmopara viticola induces cell death in grapevine and tobacco species
Source: PubMed Central journal article supplement (PMC6663016; doi:10.1371/journal.pone.0220184), 2019-07-29
Supplement: pone.0220184.s012.pdf [file pone.0220184.s012.pdf]

**Supplementary Table 4.** Constructs and primers used in this study.

**Gene identities**

|      |                        |
|------|------------------------|
| Pv18 | Plvit221r1_S0028g11635 |
| Pv31 | Plvit221r1_S0259g32900 |
| Pv33 | Plvit221r1_S0046g15019 |
| Pv82 | Plvit221r1_S0028g11682 |

**Constructs**

|                        |                                |
|------------------------|--------------------------------|
| 18 $\Delta$ sp         | 35S:Pv18 $\Delta$ 1-19         |
| 31 $\Delta$ sp         | 35S:Pv31 $\Delta$ 1-23         |
| 33 $\Delta$ sp         | 35S:Pv33 $\Delta$ 1-23         |
| 82 $\Delta$ sp         | 35S:Pv82 $\Delta$ 1-22         |
| 33FL                   | 35S:Pv33                       |
| 33 $\Delta$ sp-GFP     | 35S:Pv33 $\Delta$ 1-23-GFP     |
| 33FL-GFP               | 35S:Pv33-GFP                   |
| 33 $\Delta$ sp-GFP-NES | 35S:Pv33 $\Delta$ 1-23-GFP-NES |
| 33 $\Delta$ sp-GFP-nes | 35S Pv33 $\Delta$ 1-23-GFP-nes |

**Primers for cloning in binary plasmids (restriction sites underlined)**

|             |                                                                                          |
|-------------|------------------------------------------------------------------------------------------|
| PvRXL18sp   | 5' GCCAAAT <u>CTAGA</u> ATGTCTACGAATGCGACTGC                                             |
| PvRXL18R    | 5' TAGAAG <u>CCCGGG</u> CTATGCTGGTGC GG TGGT                                             |
| PvRXL31sp   | 5' GCACCCT <u>CTAGA</u> ATGACAAGTCTGAGTGCC                                               |
| PvRXL31R    | 5' ACAACAC <u>CCCGGG</u> TCACATTACAAAATCCTC                                              |
| PvRXL33F    | 5' TCATT <u>CTAGA</u> ATGCGCATTTCGCTACTTG                                                |
| PvRXL33sp   | 5' GCACCCTCTAGAATGACAAGGACGAATCTTCG                                                      |
| PvRXL33R    | 5' CTCTT <u>GCCCGGG</u> TCACATTTGAAAATTCGC                                               |
| PvRXL33gfF  | 5' TCATT <u>CTCGAC</u> ATGCGCATTTCGCTACTTG                                               |
| PvRXL33gfsp | 5' GCACCC <u>GTCGAC</u> ATGACAAGGACGAATCTTCG                                             |
| PvRXL33gfR  | 5' CTCTT <u>GCTAGAC</u> ATTTGAAAATTCGCTC                                                 |
| PvRXL82sp   | 5' GCAAAAT <u>CTAGA</u> ATGTCTGCGAATGCGACAGCA                                            |
| PvRXL82R    | 5' ACTAGT <u>CCCGGG</u> CTACAACCTCTTGCCAG                                                |
| GFP-F       | 5' GACTAGT <u>CTAGA</u> ATGAGTAAAGG                                                      |
| GFPNES      | 5' GCAAAC <u>cccggg</u> CTACTTGTTAATATCAAGTCCAGCCAACCTTAAGAGCAAGCTCGTTtttgatagttcatccatg |
| GFPnes      | 5' GCAAAC <u>cccggg</u> CTACTTGTTAGCATCTGCTCCAGCTGCCTTAAGAGCAAGCTCGTTtttgatagttcatccatg  |

**Primers for *V. vinifera* HSR and Actin for RT-PCR**

|         |                              |
|---------|------------------------------|
| VvACT-F | 5' GTGCCAATTTATGAAGGTTATGC   |
| VvACT-R | 5' CCCTCTCAGTTAGAATCTTCATCAG |
| VvHSR-F | 5' GGACTACCGACATGCACCTG      |
| VvHSR-R | 5' CCTGGACAATTCTGCCATCT      |
